# Supplementary material
Source: Copernicus journal article supplement (doi:10.5194/hess-30-2651-2026)
Supplement: Supplementary file 1 [file hess-30-2651-2026-supplement.pdf]

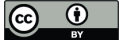

*Supplement of*

## **Introducing the Model Fidelity Metric (MFM) for robust and diagnostic land surface model evaluation**

**Zezen Wu et al.**

*Correspondence to:* Zhongwang Wei ([weizhw6@mail.sysu.edu.cn](mailto:weizhw6@mail.sysu.edu.cn)) and Yongjiu Dai ([daiyj6@mail.sysu.edu.cn](mailto:daiyj6@mail.sysu.edu.cn))

The copyright of individual parts of the supplement might differ from the article licence.

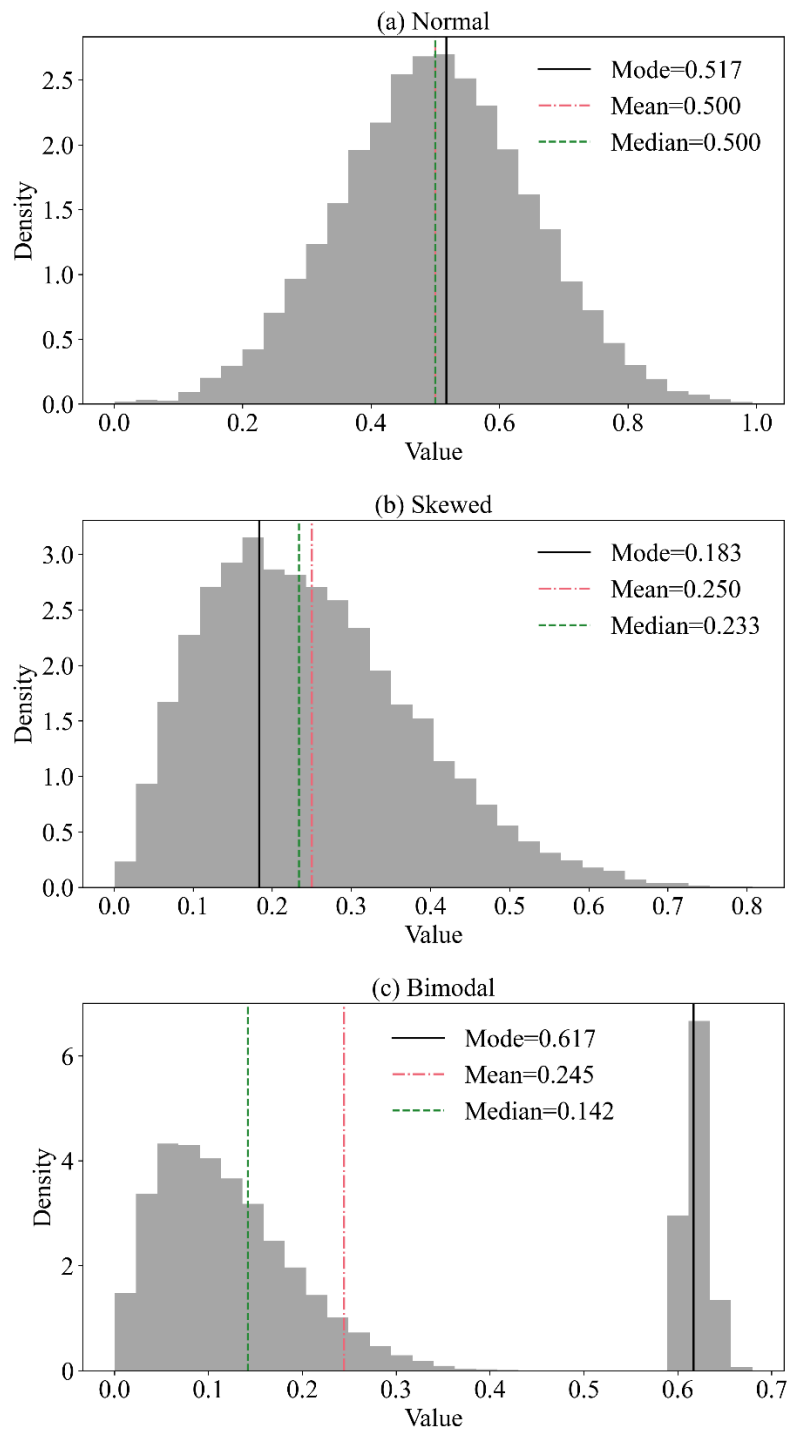

15 **Figure S1.** Artifacts of moment-based metrics. **(a)** Normal distribution. Mode, mean, and median converge. **(b)** Skewed distribution. Mean and median diverge from the mode. **(c)** Bimodal distribution. All three statistics become unrepresentative artifacts.

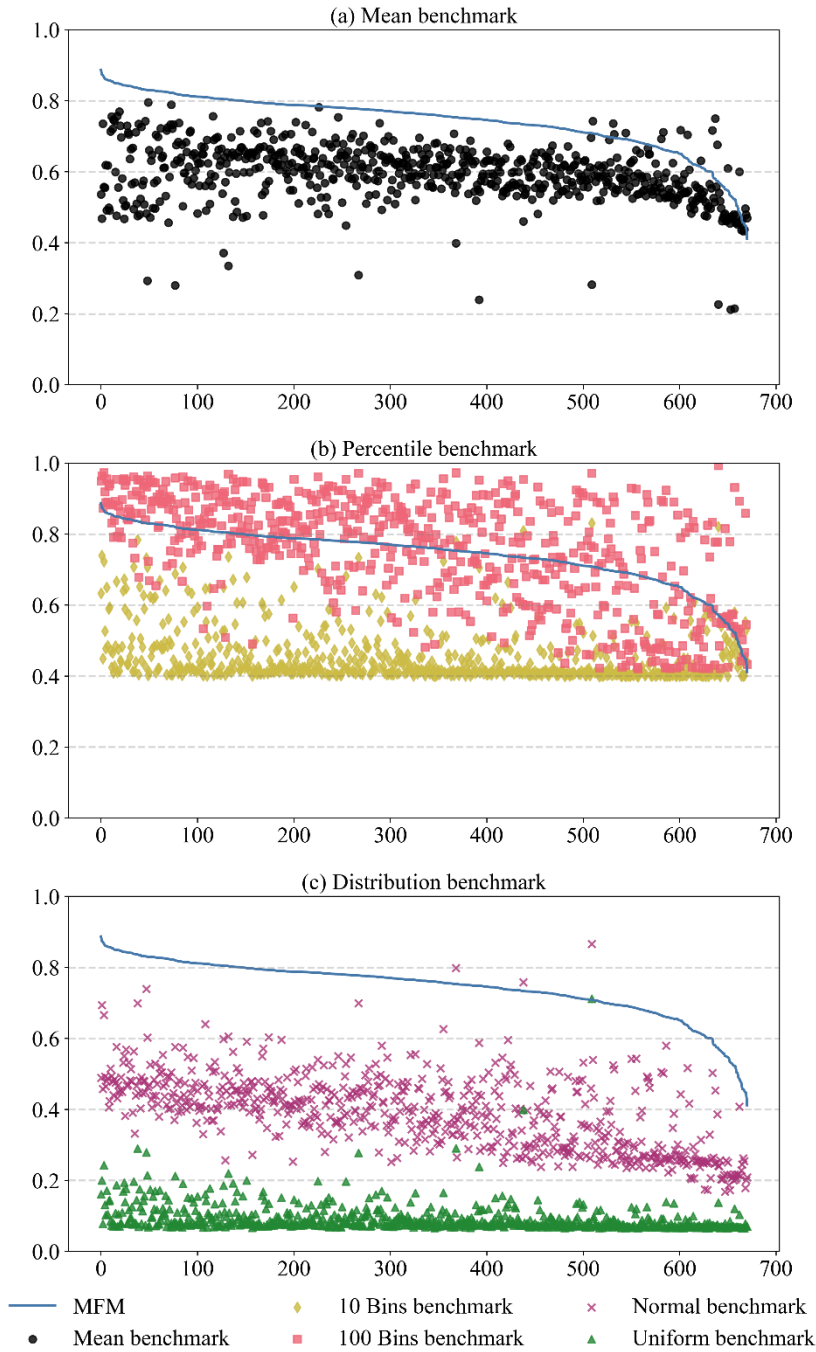

**Figure S2.** Benchmark evaluation of MFM (default parameters:  $c = 4.0$ ,  $p = 1.0$ ,  $n_{\text{SUSE}} = n_{\text{PHI}} = 10$ ). Grey lines are 0.2, 0.4, 0.6, and 0.8. CAMELS observations are benchmarked against synthetic simulations paired in rank order. Each point represents a site. **(a)** Mean benchmark. Synthetic data equal the observed mean. **(b)** Percentile benchmark. Red squares denote 100-bin discretization (percentile) and yellow diamonds represent 10-bin discretization. **(c)** Distributional benchmark. Purple crosses indicate normal sampling (matching observed mean and standard deviation). Green triangles denote uniform sampling across the observed range.

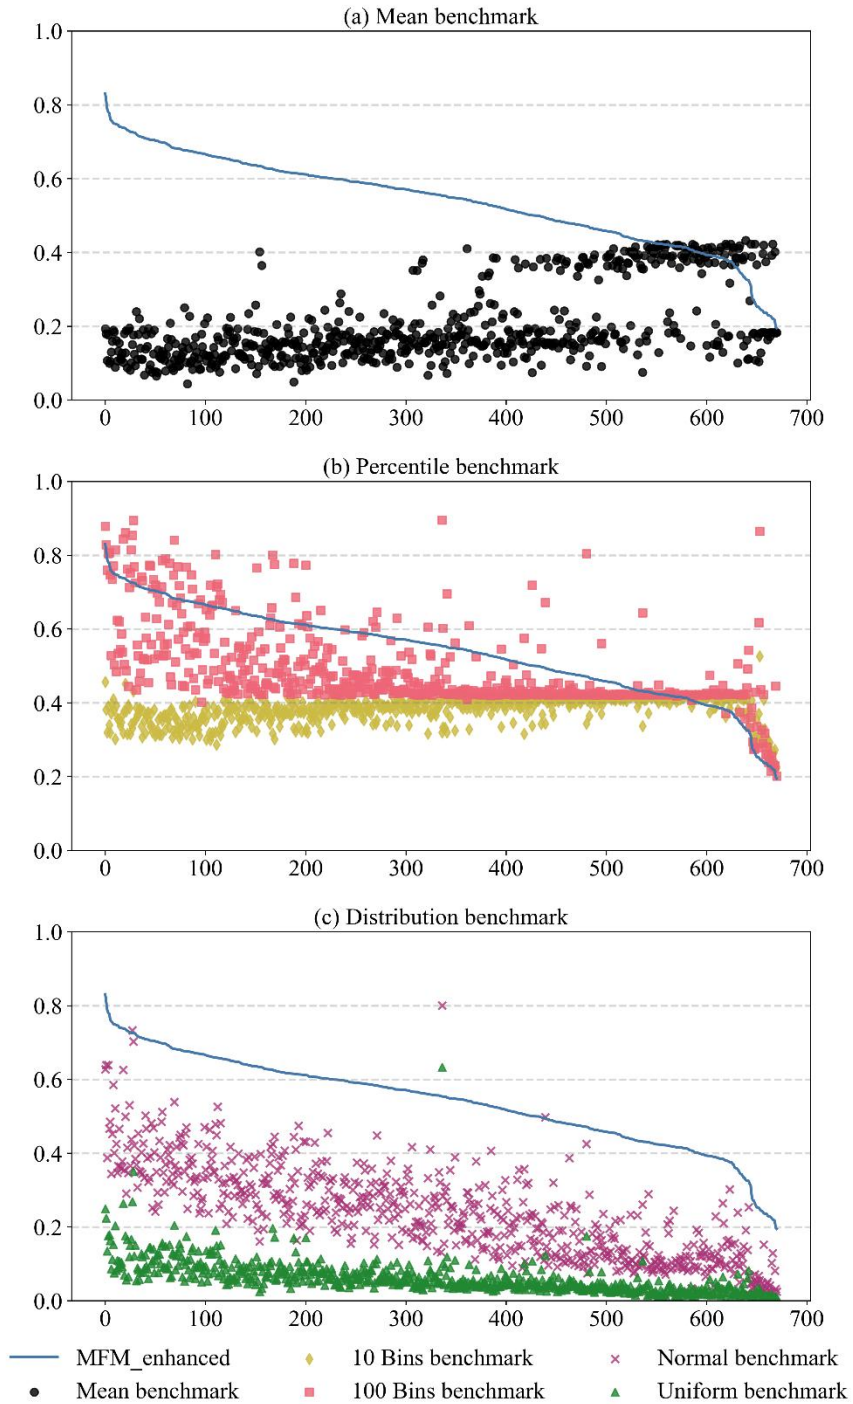

25 **Figure S3.** Benchmark evaluation of enhanced MFM (enhanced parameters:  $c = p = 2.0, n_{\text{SUSE}} = n_{\text{PHI}} = 100$ ). Grey lines are 0.2, 0.4, 0.6, and 0.8. The methodology of generating synthetic simulations is the same as in Fig. S2. **(a)** Mean benchmark. **(b)** Percentile benchmark. **(c)** Distributional benchmark.
